# Supplementary material
Source: Springer Nature journal article supplement (https://www.springermedizin.de/resource/supplementary/13019_2009_214_MOESM1_ESM.pdf/9638090)

# HCO<sub>3</sub>

mmol/L

50,00

45,00

40,00

35,00

30,00

25,00

20,00

15,00

10,00

5,00

0,00

1

2

3

4

5

6

7

8

9

10

11

12

13

14

15

16

17

18

GROUP : I (1-6) , II (7-12) , III (13-18)

◆ phase 1

■ phase 7

▲ phase 8

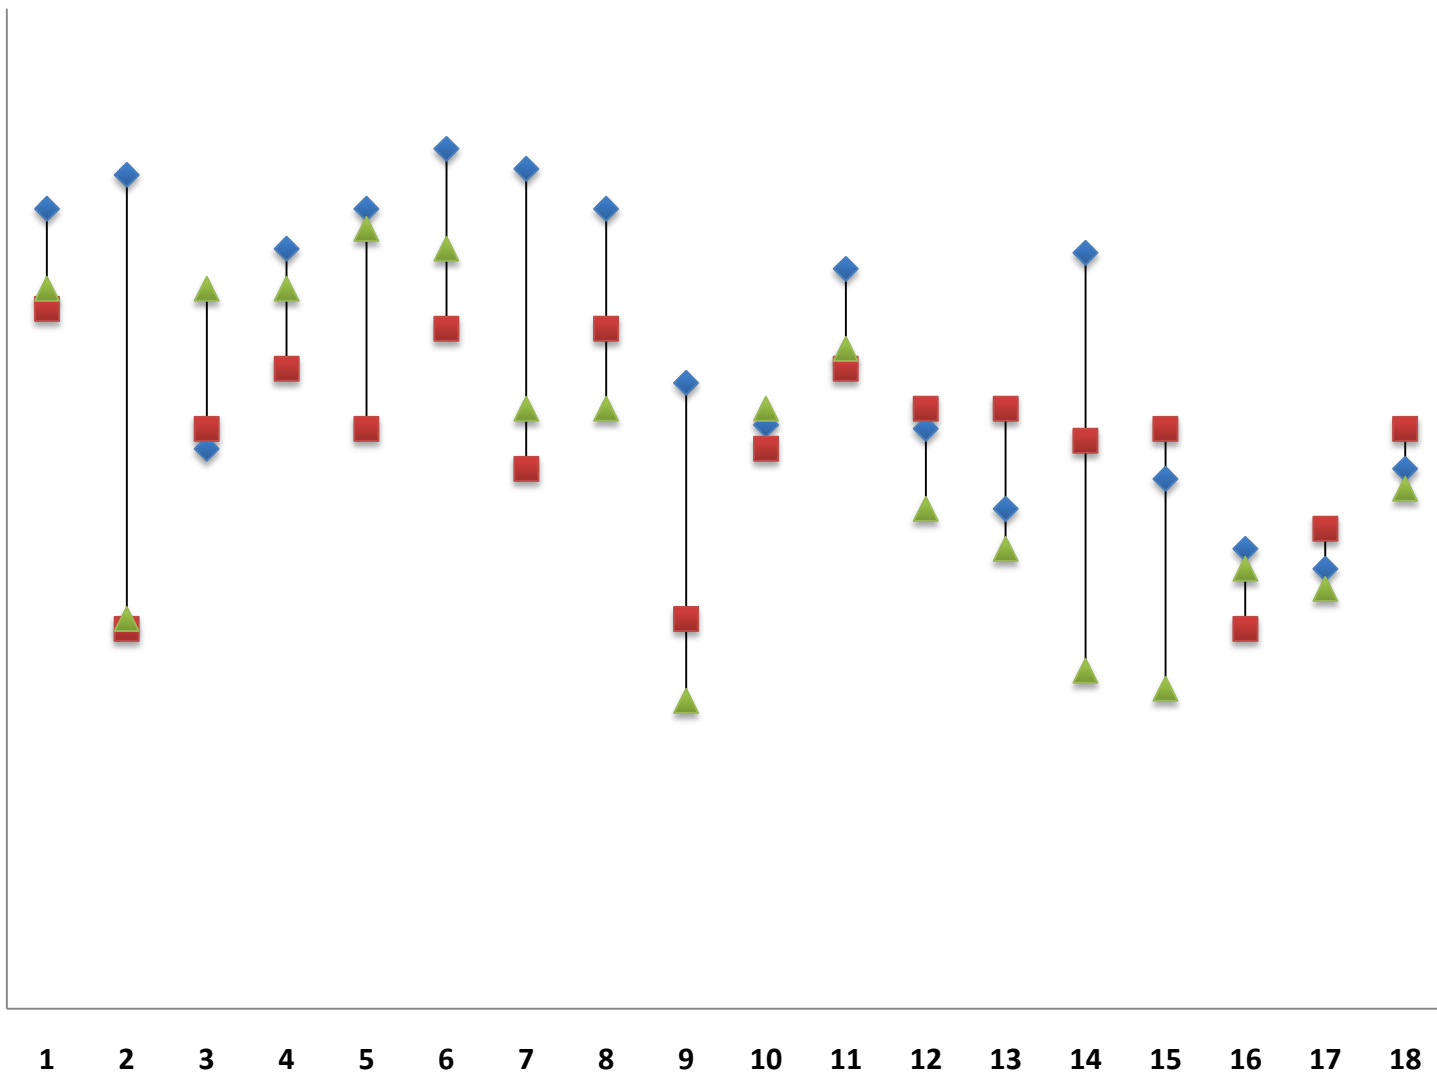

Supplement: MOESM1 [file 9638090]
